# Supplementary material for: Cost-Effectiveness of Exercise Therapy in Patients with Intermittent Claudication—A Comparison of Supervised Exercise, Home-Based Structured Exercise, and Walk Advice from the SUNFIT Trial
Source: MDPI journal article supplement (doi:10.3390/jcm12165277), 2023-08-14
Supplement: s1 [file s1]

# SUPPLEMENTARY MATERIAL

**Table S1.** Outpatient cost categories and mean number of outpatient contacts per patient per intervention group with 95% confidence intervals.

| Resource use<br>(average unit price) | WA               |             | HSEP                 |             | SEP              |               |
|--------------------------------------|------------------|-------------|----------------------|-------------|------------------|---------------|
|                                      | Mean<br>contacts | (95% CI)    | Mean<br>cont<br>acts | (95% CI)    | Mean<br>contacts | (95% CI)      |
| Doctor contact<br>(€ 328)            | 3.1              | (2.6 - 3.7) | 2.8                  | (2.2 - 3.2) | 2.8              | (2.4 - 3.3)   |
| Nurse contact<br>(€ 91)              | 0.4              | (0.2 - 0.6) | 0.3                  | (0.2 - 0.5) | 0.8              | (0.5 - 1.1)   |
| Physiotherapist<br>contact (€ 64)    | 3.7              | (3.3 - 4.0) | 6.2                  | (5.7 - 6.7) | 37.7             | (30.8 - 44.6) |

**Table S2.** Cost-effectiveness analysis based on multiple imputation analysis for HSEP vs. WA, SEP vs. WA, and HSEP versus WA.

| <b>Comparison</b> | <b>Incremental cost<br/>(95% CI)</b> | <b>Incremental QALYs<br/>(95% CI)*</b> | <b>Cost-effectiveness ratio</b> |
|-------------------|--------------------------------------|----------------------------------------|---------------------------------|
| HSEP vs. WA       | €39.57<br>(-1,194.83–1,273.97)       | 0.01<br>(-0.04–0.06)                   | €7,960 per QALY                 |
| SEP vs. WA        | €2,837.94<br>(1,112.64–4,563.25)     | 0.001<br>(-0.03–0.03)                  | €1,964,380 per QALY             |
| SEP vs. HSEP      | €2,798.37<br>(1,273.69–4,323.05)     | -0.0001<br>(-0.03–0.03)                | HSEP dominates**                |

\* Based on regression analysis controlling for baseline HRQoL score. \*\* HSEP has lower costs and better health outcomes (although the latter is not statistically significant).
